# Supplementary material
Source: PubMed Central journal article supplement (PMC4097727)
Supplement: JCM.03602-13_zjm007143537so1.pdf [file JCM.03602-13_zjm007143537so1.pdf]

Table 1. Isolate information.

| NRRL number                                                       | Provenance                                                                              | GenBank number |          |          |          |          |          |
|-------------------------------------------------------------------|-----------------------------------------------------------------------------------------|----------------|----------|----------|----------|----------|----------|
|                                                                   |                                                                                         | BT2            | CF       | ITS      | Mcm7     | RPB2     | Tsr1     |
| <i>Penicillium dimorphosporum</i> H. J. Swart MB 120334           |                                                                                         |                |          |          |          |          |          |
| 5207 <sup>T</sup>                                                 | Australia, Victoria, isol ex mangrove swamp soil, 1970.                                 | KF900165       | KF900176 | AF081804 | KF900179 | KF900187 | KF900200 |
| <i>Penicillium canis</i> S. W. Peterson MB 807056                 |                                                                                         |                |          |          |          |          |          |
| 62798 <sup>T</sup>                                                | USA, Michigan, Ann Arbor, isol ex ilium bone, dog, April 2013, <i>D.K. Langlois</i> .   | KF900167       | KF900177 | KJ511291 | KF900183 | KF900196 | KF900209 |
| z-384                                                             | USA, Mississippi, isol ex air, <i>Z. Jurjevic</i> , 2008. No longer viable.             | KF900168       | KF900178 |          | KF900184 | KF900197 | KF900210 |
| <i>Penicillium erubescens</i> D. B. Scott MB 335726               |                                                                                         |                |          |          |          |          |          |
| 5808                                                              | South Africa, isol ex uncultivated soil, <i>D. B. Scott</i> , 1969.                     | KF900169       | EU427281 | EU427289 | KF900181 | KF900198 | —        |
| 6223 <sup>T</sup>                                                 | South Africa, Pretoria, isol ex garden soil, <i>D. B. Scott</i> , 1969, ex type         | HQ646566       | HQ646577 | AF033464 | KF900182 | KF900199 | KF900208 |
| <i>Penicillium lassenii</i> J. W. Paden MB 319281                 |                                                                                         |                |          |          |          |          |          |
| 5272 <sup>T</sup>                                                 | USA, California, Lassen National Forest, isol ex forest soil, <i>J. W. Paden</i> , 1971 | KF900164       | KF900172 | AF033430 | —        | KF900186 | —        |
| <i>Penicillium menorum</i> S. W. Peterson MB 519297               |                                                                                         |                |          |          |          |          |          |
| 35663                                                             | USA, Texas, isol ex dung beetle dung ball, <i>W.T. Chan</i> , 1981                      | HQ646572       | HQ646583 | HQ646590 | HQ646599 | KF900193 | KF900205 |
| 50410 <sup>T</sup>                                                | USA, California, isol ex soil, <i>S. Menon</i> , 2009                                   | HQ646573       | HQ646584 | HQ646591 | HQ646600 | KF900194 | KF900206 |
| 58018                                                             | USA, California, isol ex air, <i>Z. Jurjevic</i> , May 2008.                            | KF900169       | KF900175 | —        | —        | KF900195 | —        |
| <i>Penicillium parvum</i> Udagawa & Y. Horie MB289101             |                                                                                         |                |          |          |          |          |          |
| 2095 <sup>T</sup>                                                 | Nicaragua, isol ex soil, <i>A.G. Kevorkian</i> , 1945                                   | HQ646568       | HQ646579 | AF033460 | HQ646595 | KF900191 | KF900207 |
| 35488                                                             | Ghana, Tafo, isol ex plantation soil, ca. 1949.                                         | KF900170       | KF900173 | —        | KF900185 | KF900192 | —        |
| <i>Penicillium pimiteouiense</i> S. W. Peterson MB460126          |                                                                                         |                |          |          |          |          |          |
| 2063                                                              | Papua-New Guinea, isol ex tent cloth, <i>G. W. Martin</i> , 1944.                       | HQ646567       | HQ646578 | HQ646588 | HQ646594 | KF900188 | KF900203 |
| <i>Penicillium rubidurum</i> Udagawa & Y. Horie MB 319295         |                                                                                         |                |          |          |          |          |          |
| 6033 <sup>T</sup>                                                 | Papua-New Guinea isol ex soil, 1975                                                     | HQ646574       | HQ646585 | HQ646588 | HQ646601 | KF900189 | KF900204 |
| <i>Penicillium vinaceum</i> J. C. Gilman & E. V. Abbott MB 281754 |                                                                                         |                |          |          |          |          |          |
| 739 <sup>T</sup>                                                  | USA, Utah, isol ex soil, 1927                                                           | HQ646575       | HQ646586 | AF033461 | HQ646602 | KF900190 | KF900201 |
| 58666                                                             | USA, Montana, isol ex air, <i>Z. Jurjevic</i> , April 2009                              | KF900171       | KF900174 | —        | KF900180 | —        | KF900202 |
